# Supplementary material
Source: ML conference proceedings conference paper supplement (https://proceedings.neurips.cc/paper_files/paper/2020/hash/fdff71fcab656abfbefaabecab1a7f6d-Abstract.html)
Supplement: Supplementary file [file fdff71fcab656abfbefaabecab1a7f6d-Supplemental.pdf]

---

# Supplementary Material for "Multiparameter Persistence Image for Topological Machine Learning"

---

**Mathieu Carrière**  
DataShape  
Inria Sophia-Antipolis  
Biot, France  
mathieu.carriere@inria.fr

**Andrew J. Blumberg**  
Department of Mathematics  
University of Texas at Austin  
Austin, TX 78712  
blumberg@math.utexas.edu

## 1 Stability results for the Multiparameter Persistence Image

The Multiparameter Persistence Image is built from the Vineyard Decomposition associated to the fibered barcode, which is a collection of successive matchings of barcodes. Fix a 2D persistence module  $M(f)$ . Considering a collection of lines  $\{\ell_i\}$ , Landi's external stability result [Lan14] implies that as a pair of lines  $\ell_i$  and  $\ell_j$  get closer together,  $\text{bcd}(f_{\ell_i})$  and  $\text{bcd}(f_{\ell_j})$  converge. This implies that the persistence image is a sensible construction in the sense that there are not discontinuous jumps in the barcodes along the matchings, provided the cover by the lines is fine enough. Moreover, these considerations also imply that for sufficiently close lines, the vineyard matching closely approximates the bottleneck distance matching.

By Landi's internal stability result [Lan14], for any two 2D persistence modules  $M(f)$  and  $M(g)$  that are close in the interleaving distance,  $\text{bcd}(f_{\ell_i})$  is close to  $\text{bcd}(g_{\ell_i})$ , with a Lipschitz constant that depends on the slope of the lines. One would hope that this would ultimately imply stability for the multiparameter persistence image. However, stability results will obtain only when these matchings are themselves stable in the 2D persistence module.

The key issue however is that under certain circumstances the trajectories produced by the matchings are arbitrary and hence can be dramatically affected by noise. Specifically, when matching barcodes  $\text{bcd}(f_{\ell_i})$  and  $\text{bcd}(f_{\ell_{i+1}})$  in which distinct bars  $b_{\ell_i}$  and  $b'_{\ell_i}$  in  $\text{bcd}(f_{\ell_i})$  are matched to a pair of identical bars  $b_{\ell_{i+1}}$  and  $b'_{\ell_{i+1}}$  in  $\text{bcd}(f_{\ell_{i+1}})$  the choice of identification is arbitrary. Composing with a third matching from  $\text{bcd}(f_{\ell_{i+1}})$  to  $\text{bcd}(f_{\ell_{i+2}})$  which separates the bars  $b_{\ell_{i+1}}$  and  $b'_{\ell_{i+1}}$  again, both trajectories are possible. Thus, given a path of matchings in which matchings of bars merge, the decomposition into distinct paths of bars cannot be expected to be stable.

We will say that a collection of lines  $L = \{\ell_i\}$  is  $\kappa$ -generic for a 2D persistence module  $M(f)$  if for any pair of trajectories in the associated Vineyard Decomposition  $D_L(f)$  there does not exist an index  $i$  such that  $m_i(b_{\ell_i})$  and  $m_i(b'_{\ell_i})$  are closer than  $\kappa$  to one another (in the  $\|\cdot\|_\infty$  norm between the bars seen as 2D points). Given a  $\kappa$ -generic trajectory for  $M(f)$ , if  $d_I(M(f), M(g)) < \epsilon < \kappa$ , then the paths will not get closer than  $\epsilon - \kappa$ . As such, we consider stability under the assumption that the perturbations are smaller than  $\kappa$ . One thing to note is that given the computation of the vineyard decomposition, it is straightforward to compute what the constant of genericity is, which we think of as being akin to a condition number.

We now assume that we are considering trajectories which are  $\kappa$ -generic and consider stability results for interleaved 2D persistence modules  $M(f)$  and  $M(g)$  such that  $d_I(M(f), M(g)) \ll \kappa$ . (In what follows, we consider the case of a collection of parallel lines for simplicity.) The basis for stability results for the multiparameter persistence image is the following easy geometric result.

**Proposition 1.1.** *Let  $\ell_1$  and  $\ell_2$  be two adjacent parallel lines parameterized by the vector  $\mathbf{e}_\theta$  that are distance  $\delta$  apart. Suppose that  $b_1 \in \text{bcd}(f_{\ell_1})$  and  $b_2 \in \text{bcd}(f_{\ell_2})$  are matched bars in the barcodes along  $\ell_1$  and  $\ell_2$  respectively. Given another 2D persistence module  $M(g)$  such that*

$d_I(M(f), M(g)) < \epsilon$ , then the change in the area of the quadrilateral specified by  $b_1$  and  $b_2$  is bounded by  $(2\delta\epsilon)/\bar{e}$ . Along a path of  $k$  parallel lines at most  $\delta$  apart, the change in area of the region trace out by the bars is bounded by  $k \cdot (2\delta\epsilon)/\bar{e}$ .

*Proof.* The change in the parallelogram is bounded by two parallelograms (on the top and on the bottom) with side lengths  $\frac{\epsilon}{\bar{e}}$  and  $\delta$ . Since the area of a parallelogram is bounded by the area of the rectangle with corresponding side lengths, the bound for a pair of lines follows. For a path of bars, summing along the path yields  $(k - 1) \frac{\epsilon\delta}{\bar{e}}$ .  $\square$

As an immediate corollary of the proposition, for a collection of lines  $\{\ell_i\}$ , we can bound the change in the area of the region swept out by the matched barcodes.

**Corollary 1.2.** *Let  $M(f)$  and  $M(g)$  be 2D persistence diagrams such that  $d_I(M(f), M(g)) < \epsilon$  and assume that the sizes of  $D_L(f)$  and  $D_L(g)$  are bounded by  $N$  and each path of matchings has maximum length  $c$  before it hits the diagonal. Then*

$$|A_f - A_g| \leq Nc \frac{\epsilon\delta}{\bar{e}},$$

where  $A_f$  and  $A_g$  denote the areas of the regions formed as the union of the parallelograms in  $\mathbb{R}^2$  specified by the matchings.

The multidimensional persistence image is a discretization of this area. To see that it is stable for sufficiently small perturbations, we recall the expression

$$(I_{L,R,p,\sigma}(f))_{i,j} = \sum_{I \in D_L(f)} w(I) \cdot \left( \omega(\ell^*) \exp \left( -\frac{\min_{\ell \in I} \|P_{i,j}, \ell\|^2}{\sigma^2} \right) \right),$$

at each grid point  $(i, j)$ . Focusing on the Gaussian, if  $d_I(M(f), M(g)) < \epsilon$  is sufficiently small, the bar realizing the min is unchanged and the distance  $\|P_{i,j}, \ell\|^2$  changes by at most  $\epsilon$ . Since we can bound the change in the value of the Gaussian in terms of  $k\epsilon$  (and some additional constants), local stability follows as long as the weightings are themselves stable. For the choices used in the body of the text, this is true by the discussion above and the work of Landi.

## 2 The Multiparameter Persistence Image is finer than the fibered barcode

In this section, we provide a simple example of a pair of graphs that rise to distinct 2D persistence modules that cannot be distinguished with the fibered barcode but can be distinguished by the Multiparameter Persistence Image.

We recall that in the 1D setting, one can compute a persistence diagram when  $X$  is a graph  $G$  with vertices  $V(G)$  and  $f$  is a function defined on the nodes of  $G$ , that is,  $f: V(G) \rightarrow \mathbb{R}$ , and is then extended in a piecewise-linear way on the edges of  $G$ . The topological structures of  $G$ , such as its branches and loops, can then be encoded in the corresponding persistence diagram.

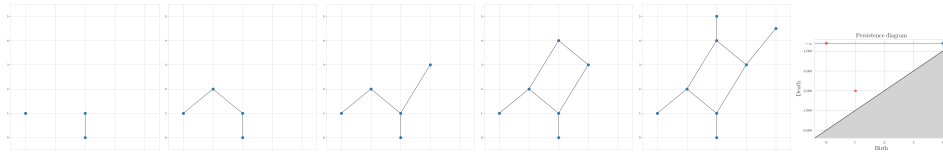

Figure 1: Each parameter  $\alpha$  generates a subgraph of the full graph  $G$ . A branch pointing downward is detected as a new connected component in the second subgraph, until it gets merged to the other component in the third subgraph. This creates a point in dimension 0 in the corresponding persistence diagram. The loop and the connected component of the graph persist infinitely, leading to points with infinite ordinates.

The following example involves a bifiltration on graphs.

**Example 2.1.** *Let  $G_1$  and  $G_2$  be two graphs defined with*

$$G_1 = \{\{a, b, c, d\}, \{[a, c], [b, c]\}\}$$

three connected nodes and one isolated one) and

$$G_2 = \{\{a, b\}, \{\}\}$$

(two isolated nodes). Moreover, let

$$f_1(a) = [0, 1], f_1(b) = [1, 0], f_1(c) = [1, 1], f_1(d) = [1, 1] \text{ and } f_2(a) = [0, 1], f_2(b) = [1, 0].$$

Then  $G_1$  and  $G_2$  have the exact same fibered barcodes (and thus identical Multiparameter Persistence Landscapes<sup>1</sup> and Kernels) in dimension 0. See Figure 2.

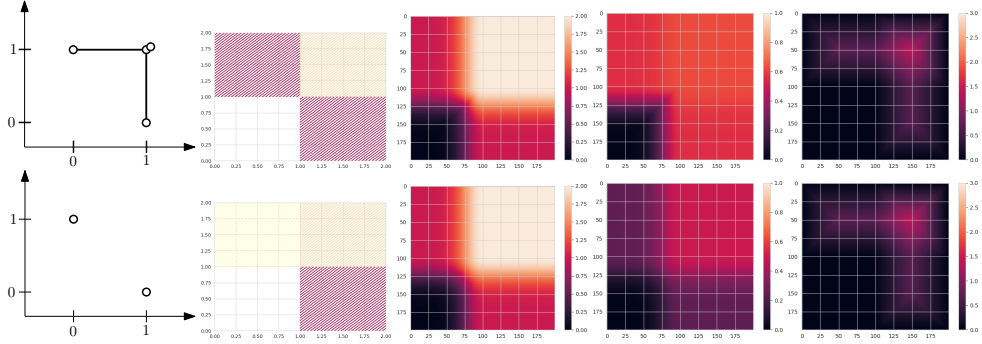

Figure 2: Vineyard Decomposition, Multiparameter Persistence Image with power  $q = 0$ , Multiparameter Persistence Image with power  $q = 2$  and Multiparameter Persistence Landscape of  $G_1$  (top row) and  $G_2$  (bottom row). Even though the Multiparameter Persistence Landscapes are the same, both Multiparameter Persistence Images successfully distinguish the graphs (even though it is harder to see for  $q = 0$ : values are slightly different around the center of the images). Moreover, the Multiparameter Persistence Kernel values (computed with the Sliced Wasserstein Kernel SW [CCO17]) are the same:  $\mathcal{K}_{K_{SW}}(G_1, G_2) = \mathcal{K}_{K_{SW}}(G_1, G_1) \simeq 138.59$ .

### 3 Time series descriptions

Descriptions of sizes and number of classes are available in Table 1.

| Dataset                        | Train | Test | Length | Nb classes |
|--------------------------------|-------|------|--------|------------|
| DistalPhalanxOutlineAgeGroup   | 400   | 139  | 80     | 3          |
| DistalPhalanxOutlineCorrect    | 600   | 276  | 80     | 2          |
| DistalPhalanxTW                | 400   | 139  | 80     | 6          |
| ECG200                         | 100   | 100  | 96     | 2          |
| GunPoint                       | 50    | 150  | 150    | 2          |
| ItalyPowerDemand               | 67    | 1029 | 24     | 2          |
| MedicalImages                  | 381   | 760  | 99     | 10         |
| Plane                          | 105   | 105  | 144    | 7          |
| ProximalPhalanxOutlineAgeGroup | 400   | 205  | 80     | 3          |
| ProximalPhalanxOutlineCorrect  | 600   | 291  | 80     | 2          |
| ProximalPhalanxTW              | 400   | 205  | 80     | 6          |
| SwedishLeaf                    | 500   | 625  | 128    | 15         |
| SyntheticControl               | 300   | 300  | 60     | 6          |
| GunPointAgeSpan                | 135   | 316  | 150    | 2          |
| GunPointMaleVersusFemale       | 135   | 316  | 150    | 2          |
| GunPointOldVersusYoung         | 136   | 315  | 150    | 2          |
| PowerCons                      | 180   | 180  | 144    | 2          |

Table 1: Training and testing sizes, and time series length for our experiments.

Computation times for homological dimension 1 are available in Table 2.

Cross-validated resolutions are available in Table 3.

<sup>1</sup>A weighted version of the Multiparameter Persistence Landscape is defined in [Vip20], which could potentially distinguish these two multifiltrations, but it is unclear how to choose the weight and implement it.

| Dataset                        | MP-K    | MP-L   | MP-I         |
|--------------------------------|---------|--------|--------------|
| DistalPhalanxOutlineAgeGroup   | 10109.2 | 631.2  | <b>135.0</b> |
| DistalPhalanxOutlineCorrect    | 53402.7 | 2075.8 | <b>503.8</b> |
| DistalPhalanxTW                | 10251.9 | 354.2  | <b>80.0</b>  |
| ProximalPhalanxOutlineAgeGroup | 13657.6 | 590.8  | <b>147.2</b> |
| ProximalPhalanxOutlineCorrect  | 44267.2 | 1240.0 | <b>299.0</b> |
| ProximalPhalanxTW              | 13913.1 | 238.6  | <b>56.8</b>  |
| ECG200                         | 1806.0  | 1972.4 | <b>336.0</b> |
| ItalyPowerDemand               | 68895.0 | 1144.0 | <b>227.9</b> |
| MedicalImages                  | 74510.8 | 1699.6 | <b>406.0</b> |
| Plane                          | 1929.8  | 898.5  | <b>203.0</b> |
| SwedishLeaf                    | 22657.8 | 1779.4 | <b>460.8</b> |
| GunPoint                       | 2012.0  | 2387.5 | <b>343.8</b> |
| GunPointAgeSpan                | 11829.7 | 2499.1 | <b>560.0</b> |
| GunPointMaleVersusFemale       | 11816.2 | 2580.8 | <b>628.3</b> |
| GunPointOldVersusYoung         | 14067.8 | 3190.4 | <b>802.7</b> |
| PowerCons                      | 9002.4  | 2934.9 | <b>791.7</b> |
| SyntheticControl               | 18559.3 | 661.5  | <b>165.5</b> |

Table 2: Computation time (s) for time series in dimension 1.

| Dataset                        | MP-I  | MP-L  | P-I   | P-L   |
|--------------------------------|-------|-------|-------|-------|
| DistalPhalanxOutlineAgeGroup   | 2,500 | 2,500 | 2,500 | 100   |
| DistalPhalanxOutlineCorrect    | 2,500 | 2,500 | 100   | 100   |
| DistalPhalanxTW                | 2,500 | 2,500 | 100   | 100   |
| ProximalPhalanxOutlineAgeGroup | 2,500 | 100   | 2,500 | 100   |
| ProximalPhalanxOutlineCorrect  | 100   | 2,500 | 2,500 | 100   |
| ProximalPhalanxTW              | 2,500 | 100   | 2,500 | 2,500 |
| ECG200                         | 100   | 2,500 | 100   | 2,500 |
| ItalyPowerDemand               | 2,500 | 100   | 2,500 | 100   |
| MedicalImages                  | 2,500 | 2,500 | 100   | 2,500 |
| Plane                          | 2,500 | 2,500 | 100   | 100   |
| SwedishLeaf                    | 2,500 | 2,500 | 100   | 100   |
| GunPoint                       | 2,500 | 2,500 | 100   | 2,500 |
| GunPointAgeSpan                | 100   | 100   | 2,500 | 2,500 |
| GunPointMaleVersusFemale       | 2,500 | 100   | 100   | 100   |
| GunPointOldVersusYoung         | 2,500 | 2,500 | 100   | 100   |
| PowerCons                      | 2,500 | 2,500 | 2,500 | 100   |
| SyntheticControl               | 100   | 2,500 | 100   | 2,500 |

Table 3: Best resolutions (selected with cross-validation) for time series.

Cross-validation results are available in Table 4.

## 4 Graph experiments

We made a series of experiments on graph classification. It is natural to imagine that topological features of the graphs might require multiple functions to be fully recovered, see Figure 1. In these experiments, we use the Ricci curvature and the heat kernel signature with time 10 (similarly to what was used in [ZW19, CCI<sup>+</sup>20]) for computing multiparameter persistence in homological dimension 0. Data come from standard graph classification data sets containing biological and social network graphs. See Table 5 for a description of the graph classification tasks. Moreover, we use the exact same parameters than the ones we used for time series and immunofluorescence images classification (see main paper, Section 4), except for the lines, which are now computed using the minima and maxima of Ricci curvature and heat kernel signatures.

Results are displayed in Table 6. Accuracies are averaged over 5 train/test splits of the data sets obtained with 5 stratified folds. Here, all of the multidimensional persistence summaries have essentially the same performance, although the Multiparameter Persistence Kernel is slightly better

| Dataset                        | MP-I        | MP-L        | P-I         | P-L         |
|--------------------------------|-------------|-------------|-------------|-------------|
| DistalPhalanxOutlineAgeGroup   | 80.8 ± 0.17 | 80.0 ± 0.14 | 80.0 ± 0.15 | 80.0 ± 0.13 |
| DistalPhalanxOutlineCorrect    | 80.7 ± 0.05 | 76.3 ± 0.09 | 74.8 ± 0.08 | 71.3 ± 0.07 |
| DistalPhalanxTW                | 78.0 ± 0.02 | 77.0 ± 0.02 | 76.8 ± 0.03 | 77.2 ± 0.05 |
| ProximalPhalanxOutlineAgeGroup | 82.2 ± 0.11 | 81.0 ± 0.13 | 80.2 ± 0.11 | 80.5 ± 0.12 |
| ProximalPhalanxOutlineCorrect  | 77.5 ± 0.03 | 79.3 ± 0.04 | 73.7 ± 0.07 | 74.0 ± 0.04 |
| ProximalPhalanxTW              | 77.8 ± 0.02 | 78.8 ± 0.04 | 76.2 ± 0.03 | 75.8 ± 0.03 |
| ECG200                         | 83.0 ± 0.07 | 80.0 ± 0.12 | 75.0 ± 0.11 | 69.0 ± 0.06 |
| ItalyPowerDemand               | 86.6 ± 0.06 | 86.6 ± 0.07 | 71.6 ± 0.13 | 59.7 ± 0.15 |
| MedicalImages                  | 60.9 ± 0.02 | 57.5 ± 0.03 | 55.1 ± 0.03 | 54.6 ± 0.04 |
| Plane                          | 89.5 ± 0.04 | 89.5 ± 0.03 | 88.6 ± 0.03 | 79.0 ± 0.09 |
| SwedishLeaf                    | 78.8 ± 0.04 | 58.8 ± 0.01 | 48.0 ± 0.04 | 38.8 ± 0.03 |
| GunPoint                       | 92.0 ± 0.08 | 90.0 ± 0.12 | 88.0 ± 0.05 | 78.0 ± 0.17 |
| GunPointAgeSpan                | 95.6 ± 0.02 | 88.9 ± 0.04 | 94.8 ± 0.02 | 91.9 ± 0.06 |
| GunPointMaleVersusFemale       | 97.0 ± 0.01 | 89.6 ± 0.03 | 89.6 ± 0.05 | 85.9 ± 0.06 |
| GunPointOldVersusYoung         | 99.3 ± 0.01 | 95.6 ± 0.05 | 97.1 ± 0.06 | 95.6 ± 0.03 |
| PowerCons                      | 91.1 ± 0.1  | 80.6 ± 0.06 | 84.4 ± 0.06 | 75.6 ± 0.09 |
| SyntheticControl               | 56.3 ± 0.05 | 53.0 ± 0.05 | 50.0 ± 0.04 | 44.7 ± 0.06 |

Table 4: Cross-validation classification results for time series.

| Dataset     | Nb graphs | Nb classes | Av. nodes | Av. edges | Av. $\beta_0$ | Av. $\beta_1$ |
|-------------|-----------|------------|-----------|-----------|---------------|---------------|
| BZR         | 405       | 2          | 35.75     | 38.36     | 1.0           | 3.61          |
| COX2        | 467       | 2          | 41.22     | 43.45     | 1.0           | 3.22          |
| DHFR        | 756       | 2          | 42.43     | 44.54     | 1.0           | 3.12          |
| IMDB-BINARY | 1,000     | 2          | 19.77     | 96.53     | 1.0           | 77.76         |
| IMDB-MULTI  | 1,500     | 3          | 13.00     | 65.94     | 1.0           | 53.93         |
| MUTAG       | 188       | 2          | 17.93     | 19.79     | 1.0           | 2.86          |
| PROTEINS    | 1,113     | 2          | 39.06     | 72.82     | 1.08          | 34.84         |

Table 5: Datasets description.  $\beta_0$  (resp.  $\beta_1$ ) stands for the 0th-Betti-number (resp. 1st), that is the number of connected components (resp. cycles) in a graph. In particular, an average  $\beta_0 = 1.0$  means that all graph in the dataset are connected, and in this case  $\beta_1 = \#\{\text{edges}\} - \#\{\text{nodes}\}$ .

in almost all cases. In this case, the conclusion we draw is that the fibered barcodes alone already contain all the salient topological information. Notice again that the fibered barcodes remain superior to the 1D-persistence summaries, however.

| Dataset     | P          | MP-K              | MP-L              | MP-I       |
|-------------|------------|-------------------|-------------------|------------|
| BZR         | 82.7 ± 2.5 | <b>86.2 ± 2.6</b> | 85.7 ± 2.5        | 84.2 ± 2.3 |
| COX2        | 76.0 ± 4.1 | <b>79.9 ± 1.8</b> | 79.0 ± 3.3        | 77.9 ± 2.7 |
| DHFR        | 70.9 ± 3.1 | <b>81.7 ± 1.9</b> | 79.5 ± 2.3        | 80.2 ± 2.2 |
| IMDB-BINARY | 54.0 ± 1.9 | 68.2 ± 1.2        | <b>71.2 ± 2.0</b> | 71.1 ± 2.1 |
| IMDB-MULTI  | 36.3 ± 1.1 | <b>46.9 ± 2.6</b> | 46.2 ± 2.3        | 46.7 ± 2.7 |
| MUTAG       | 79.2 ± 7.7 | <b>86.1 ± 5.2</b> | 84.0 ± 6.8        | 85.6 ± 7.3 |
| PROTEINS    | 65.4 ± 2.7 | <b>67.5 ± 3.1</b> | 65.8 ± 3.3        | 67.3 ± 3.5 |

Table 6: Classification results for graphs.

## References

- [ACC<sup>+</sup>20] Andrew Aukerman, Mathieu Carrière, Chao Chen, Kevin Gardner, Raúl Rabadán, and Rami Vanguri. Persistent homology based characterization of the breast cancer immune microenvironment: a feasibility study. *To appear in 36th International Symposium on Computational Geometry (SoCG 2020)*, 2020.
- [ACG<sup>+</sup>18] Hirokazu Anai, Frédéric Chazal, Marc Glisse, Yuichi Ike, Hiroya Inakoshi, Raphaël Tinarrage, and Yuhei Umeda. DTM-based filtrations. In *CoRR. To appear in 36th*

- International Symposium on Computational Geometry (SoCG 2020)*. arXiv:1811.04757, 2018.
- [AEK<sup>+</sup>17] Henry Adams, Tegan Emerson, Michael Kirby, Rachel Neville, Chris Peterson, Patrick Shipman, Sofya Chepushtanova, Eric Hanson, Francis Motta, and Lori Ziegelmeier. Persistence images: a stable vector representation of persistent homology. *Journal of Machine Learning Research*, 18(8):1–35, 2017.
- [BCB18] Magnus Botnan and William Crawley-Boevey. Decomposition of persistence modules. In *CoRR*. arXiv:1811.08946, 2018.
- [BGMP14] Andrew J. Blumberg, Itamar Gal, Michael Mandell, and Matthew Pancia. Robust statistics, hypothesis testing, and confidence intervals for persistent homology on metric measure spaces. *Foundations of Computational Mathematics*, 14(4):745–789, 2014.
- [BL20] Andrew J. Blumberg and Michael Lesnick. Stability of 2-parameter persistent homology. In *CoRR*. arXiv:2010.09628, 2020.
- [BLO20] Magnus Botnan, Vadim Lebovici, and Steve Oudot. On rectangle-decomposable 2-parameter persistence modules. In *CoRR*. arXiv:2002.08894, 2020.
- [Bub15] Peter Bubenik. Statistical topological data analysis using persistence landscapes. *Journal of Machine Learning Research*, 16(3):77–102, 2015.
- [Car14] Gunnar Carlsson. Topological pattern recognition for point cloud data. *Acta Numerica*, 23:289–368, 2014.
- [Car20] Mathieu Carrière. Multipers package, <https://github.com/MathieuCarriere/multipers>. 2020.
- [CCI<sup>+</sup>20] Mathieu Carrière, Frédéric Chazal, Yuichi Ike, Théo Lacombe, Martin Royer, and Yuhei Umeda. PersLay: a neural network layer for persistence diagrams and new graph topological signatures. In Silvia Chiappa and Roberto Calandra, editors, *To appear in 23rd International Conference on Artificial Intelligence and Statistics (AISTATS 2020)*. JMLR.org, 2020.
- [CCO17] Mathieu Carrière, Marco Cuturi, and Steve Oudot. Sliced Wasserstein kernel for persistence diagrams. In Doina Precup and Yee Whye Teh, editors, *34th International Conference on Machine Learning (ICML 2017)*, volume 70, pages 664–673. JMLR.org, 2017.
- [CFK<sup>+</sup>19] René Corbet, Ulderico Fugacci, Michael Kerber, Claudia Landi, and Bei Wang. A kernel for multi-parameter persistent homology. *Computers & Graphics: X*, 2:100005, 2019.
- [CFL<sup>+</sup>18] Frédéric Chazal, Brittany Fasy, Fabrizio Lecci, Bertrand Michel, Alessandro Rinaldo, and Larry Wasserman. Robust topological inference: distance to a measure and kernel distance. *Journal of Machine Learning Research*, 18(159):1–40, 2018.
- [CGLM15] Frédéric Chazal, Marc Glisse, Catherine Labruère, and Bertrand Michel. Convergence rates for persistence diagram estimation in topological data analysis. *Journal of Machine Learning Research*, 16(110):3603–3635, 2015.
- [CKMW20] Chen Cai, Woojin Kim, Facundo Mémoli, and Yusu Wang. Elder-rule-staircodes for augmented metric spaces. In Sergio Cabello and Danny Chen, editors, *36th International Symposium on Computational Geometry (SoCG 2020)*, pages 26:1–26:17. Schloss Dagstuhl – Leibniz-Zentrum fuer Informatik, 2020.
- [CO19] Jérémy Cochoy and Steve Oudot. Decomposition of exact pfd persistence bimodules. *Discrete & Computational Geometry*, pages 1–39, 2019.
- [COO15] Mathieu Carrière, Steve Oudot, and Maks Ovsjanikov. Stable topological signatures for points on 3D shapes. *Computer Graphics Forum*, 34(5):1–12, 2015.

- [CR20] Mathieu Carrière and Raúl Rabadán. Topological data analysis of single-cell Hi-C contact maps. In Nils Baas, Gunnar Carlsson, Marius Thaule, Gereon Quick, and Markus Szymik, editors, *To appear in The Abel Symposium 2018*, volume 15. Springer-Verlag, 2020.
- [CSEM06] David Cohen-Steiner, Herbert Edelsbrunner, and Dmitriy Morozov. Vines and vineyards by updating persistence in linear time. In Nina Amenta and Otfried Cheong, editors, *22nd Annual Symposium on Computational Geometry (SoCG 2006)*, pages 119–126. Association for Computing Machinery, 2006.
- [CZ09] Gunnar Carlsson and Afra Zomorodian. The theory of multidimensional persistence. *Discrete & Computational Geometry*, 42(1):71–93, 2009.
- [DBK<sup>+</sup>18] Hoang-Anh Dau, Anthony Bagnall, Kaveh Kamgar, Chin-Chia Yeh, Yan Zhu, Shaghayegh Gharghabi, Chotirat Ratanamahatana, and Eamonn Keogh. The UCR time series archive. In *CoRR*. arXiv:1810.07758, 2018.
- [dCBSB17] Jean de Carufel, Martin Brooks, Michael Stieber, and Paul Britton. A topological approach to scaling in financial data. In *CoRR*. arXiv:1710.08860, 2017.
- [EH10] Herbert Edelsbrunner and John Harer. *Computational topology: an introduction*. American Mathematical Society, 2010.
- [FLR<sup>+</sup>14] Brittany Fasy, Fabrizio Lecci, Alessandro Rinaldo, Larry Wasserman, Sivaraman Balakrishnan, and Aarti Singh. Confidence sets for persistence diagrams. *The Annals of Statistics*, 42(6):2301–2339, 2014.
- [GGK<sup>+</sup>18] Marian Gidea, Daniel Goldsmith, Yuri Katz, Pablo Roldan, and Yonah Shmalo. Topological recognition of critical transitions in time series of cryptocurrencies. In *CoRR*. arXiv:1809.00695, 2018.
- [GK18] Marian Gidea and Yuri Katz. Topological data analysis of financial time series: landscapes of crashes. *Physica A: Statistical Mechanics and its Applications*, 491:820–834, 2018.
- [GMH<sup>+</sup>18] Robyn Gartrell, Douglas Marks, Thomas Hart, Gen Li, Danielle Davari, Alan Wu, Zoë Blake, Yan Lu, Kayleigh Askin, Anthea Monod, Camden Esancy, Edward Stack, Dan Tong Jia, Paul Armenta, Yichun Fu, Daisuke Izaki, Bret Taback, Raúl Rabadán, Howard Kaufman, Charles Drake, Basil Horst, and Yvonne Saenger. Quantitative analysis of immune infiltrates in primary melanoma. *Cancer Immunology Research*, 6(4):481–493, 2018.
- [GPCI15] Chad Giusti, Eva Pastalkova, Carina Curto, and Vladimir Itskov. Clique topology reveals intrinsic geometric structure in neural correlations. *Proceedings of the National Academy of Sciences*, 112(44):13455–13460, 2015.
- [HMMB19] Devon Humphreys, Melissa McGuirl, Michael Miyagi, and Andrew Blumberg. Fast estimation of recombination rates using topological data analysis. *Genetics*, 2019.
- [KDS<sup>+</sup>18] Lida Kanari, Pawel Dlotko, Martina Scolamiero, Ran Levi, Julian Shillcock, Kathryn Hess, and Henry Markram. A topological representation of branching neuronal morphologies. *Neuroinformatics*, 16:3–13, 2018.
- [KHF16] Genki Kusano, Yasuaki Hiraoka, and Kenji Fukumizu. Persistence weighted Gaussian kernel for topological data analysis. In Maria Florina Balcan and Kilian Weinberger, editors, *33rd International Conference on Machine Learning (ICML 2016)*, volume 48, pages 2004–2013. JMLR.org, 2016.
- [KLO19] Michael Kerber, Michael Lesnick, and Steve Oudot. Exact computation of the matching distance on 2-parameter persistence modules. In Gill Barequet and Yusu Wang, editors, *Leibniz International Proceedings in Informatics, LIPIcs*, volume 129, pages 46:1–46:15. Schloss Dagstuhl–Leibniz-Zentrum fuer Informatik, 2019.

- [KN19] Michael Kerber and Arnur Nigmatov. Efficient approximation of the matching distance for 2-parameter persistence. In *CoRR*. arXiv:1912.05826, 2019.
- [Lan14] Claudia Landi. The rank invariant stability via interleavings. In *CoRR*. arXiv:1412.3374, 2014.
- [Les15] Michael Lesnick. The theory of the interleaving distance on multidimensional persistence modules. *Foundations of Computational Mathematics*, 15:613–650, 2015.
- [LOC14] Chunyuan Li, Maks Ovsjanikov, and Frédéric Chazal. Persistence-based structural recognition. In Sven Dickinson, Dimitri Metaxas, and Matthew Turk, editors, *27th IEEE Conference on Computer Vision and Pattern Recognition (CVPR 2014)*, pages 2003–2010. IEEE Computer Society, 2014.
- [LW15] Michael Lesnick and Matthew Wright. Interactive visualization of 2D persistence modules. In *CoRR*. arXiv:1512.00180, 2015.
- [LY18] Tam Le and Makoto Yamada. Persistence Fisher kernel: a Riemannian manifold kernel for persistence diagrams. In Samy Bengio, Hanna Wallach, Hugo Larochelle, Kristen Grauman, Nicolò Cesa-Bianchi, and Roman Garnett, editors, *Advances in Neural Information Processing Systems 31 (NeurIPS 2018)*, pages 10027–10038. Curran Associates, Inc., 2018.
- [Oud15] Steve Oudot. *Persistence theory: from quiver representations to data analysis*. American Mathematical Society, 2015.
- [PH15] Jose Perea and John Harer. Sliding windows and persistence: an application of topological methods to signal analysis. *Foundations of Computational Mathematics*, 15(3):799–838, 2015.
- [PSO18] Adrien Poulenard, Primoz Skraba, and Maks Ovsjanikov. Topological function optimization for continuous shape matching. *Computer Graphics Forum*, 37(5):13–25, 2018.
- [RB19] Raúl Rabadán and Andrew J. Blumberg. *Topological data analysis for genomics and evolution*. Cambridge University Press, 2019.
- [RHBK15] Jan Reininghaus, Stefan Huber, Ulrich Bauer, and Roland Kwitt. A stable multi-scale kernel for topological machine learning. In Horst Bischof, David Forsyth, Cordelia Schmid, and Stan Sclaroff, editors, *28th IEEE Conference on Computer Vision and Pattern Recognition (CVPR 2015)*, pages 4741–4748. IEEE Computer Society, 2015.
- [SBSO16] Alexandra Signoriello, Marcus Bosenberg, Mark Shattuck, and Corey O’Hern. Modeling the spatiotemporal evolution of the melanoma tumor microenvironment. In *APS Meeting Abstracts*, 2016.
- [TMMH14] Katharine Turner, Yuriy Mileyko, Sayan Mukherjee, and John Harer. Fréchet means for distributions of persistence diagrams. *Discrete & Computational Geometry*, 52(1):44–70, 2014.
- [Vip20] Oliver Vipond. Multiparameter persistence landscapes. *Journal of Machine Learning Research*, 21(61):1–38, 2020.
- [ZW19] Qi Zhao and Yusu Wang. Learning metrics for persistence-based summaries and applications for graph classification. In Hanna Wallach, Hugo Larochelle, Alina Beygelzimer, Florence D’Alché-Buc, Emily Fox, and Roman Garnett, editors, *Advances in Neural Information Processing Systems 32 (NeurIPS 2019)*, pages 9855–9866. Curran Associates, Inc., 2019.
